# Supplementary material for: Coupling between the JULES land-surface scheme and the CCATT-BRAMS atmospheric chemistry model (JULES-CCATT-BRAMS1.0): applications to numerical weather forecasting and the CO 2 budget in South America
Source: Copernicus journal article supplement (doi:10.5194/gmd-6-1243-2013), 2013-08-22
Supplement: Supplementary file 1 [file gmd-6-1243-2013-supplement.pdf]

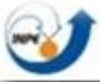

Ministério da  
Ciência, Tecnologia  
e Inovação

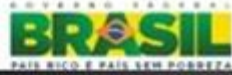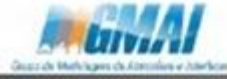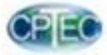

# JULES-CCATT-BRAMS

Requisites Necessary

Guide to compile and run

Test Case

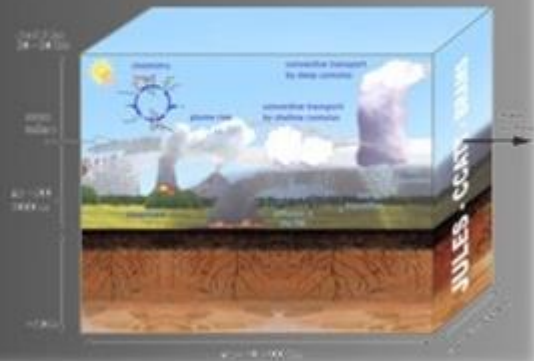

---

## Guide to: JULES-CCATT-BRAMS1.0

---

---

Author: Demerval Soares Moreira (demerval.moreira@cptec.inpe.br)

---

---

CPTEC/INPE/Bazil

Last revision: 15/Mar/2013

---

## 1 INTRODUCTION:

This guide shows the requisites necessary to compile and run JULES-CCATT-BRAMS1.0 model and pre/post processing. Also have a description of a Test Case. Further details can be obtained in BRAMS homepage: <http://brams.cptec.inpe.br>

JULES-CCATT-BRAMS1.0 was originated of coupling between jules-v3.0 and CCATT\_BRAMS4.3.3.

## 2 REQUISITES:

### 2.1 Necessary:

- a) A good machine (preference for scalar machine with over 100 processors)
- b) mpich2 (<http://phase.hpcc.jp/mirrors/mpi/mpich2/>)
- c) LINUX operating system (or UNIX, but not tested in this system)
- d) FORTAN-90 compiler (preference to PGI-FORTRAN)
- e) Netcdf library (<http://www.unidata.ucar.edu/downloads/netcdf/index.jsp>)
- f) HDF4 library (<http://www.hdfgroup.org/products/hdf4/>)
- g) zlib library (<http://www.zlib.net/>)
- h) jpeg library (<http://www.ijg.org/>)
- i) Signed the JULES licence agreement (<https://jules.ichmr.org/software-and-documentation>)

### 2.2 Recommended versions (were used by me)

- a) CRAY Cluster (2.1 GHz AMD Opteron processors) using 360 processors
- b) xt-mpich2\_5.5.4 (Cray MPICH2 Message Passing Interface)
- c) SUSE Linux - 2.6.27.48-0.12-default - x86\_64
- d) PGI\_VERSION 11.3 (pgf90 11.3-0 64-bit)
- e) netcdf-3.6.2
- f) hdf-4.2.5
- g) zlib-1.2.7
- h) jpeg-8d

## 3 TO COMPILE THE LIBRAIES (Netcdf, HDF4, zlib and jpeg):

➤ Libraries and JULES-CCATT-BRAMS must be compiled with the some compiler.

- a) Shell command: "export CC=<C compiler>" (ex: export CC=pgcc)
- b) Shell command: "export F77=<F77 compiler>" (ex: export F77=pgf77)
- c) Shell command: "export FC=<F90 compiler>" (ex: export FC=pgf90)
- d) Go to: ./source/LIBS/netcdf-3.6.2 or ./source/LIBS/hdf-4.2.5 or ./source/LIBS/zlib-1.2.7 or ./source/LIBS/jpeg-8d
- e) Execute: DIR=\$(pwd); ./configure --prefix=\$DIR/installed
- f) Execute: make

- g) Execute: make install
- h) Repeat items d-g until to compile the four libraries

#### 4 TO COMPILE JULES-CCATT-BRAMS:

- a) Open in a ascci editor the file: `./source/JULES-CCATT-BRAMS1.0/src/brams/jules/LIB/Makefile`
- b) On line 56 inform the netcdf PATH
- c) On lines 108 and 118 inform the compiler name
- d) If pgf is not your compiler, create a file to your compiler with name: `./source/JULES-CCATT-BRAMS1.0/build/bin/include.mk.<COMPILES>`, similar to: `./source/JULES-CCATT-BRAMS1.0/build/bin/include.mk.pgf`
- e) Open in a ascci editor the file: `./source/JULES-CCATT-BRAMS1.0/build/bin/include.mk.<COMPILES>`
- f) In lines 25 and 27, inform the compiler name
- g) In lines 31, 34 and 36 you can change the options to your compilation.
- h) Execute: `./source/JULES-CCATT-BRAMS1.0/build/bin/comp.bash`

- If everything was alright, was generated the executable: `./source/JULES-CCATT-BRAMS1.0/build/ccatt-brams-4.3-<COMPILES>-CO2_JULES`

#### 5 TO EXECUTE JULES-CCATT-BRAMS:

##### 5.1 Requisites:

- a) JULES-CCATT-BRAMS Executable
  - ⇒ obtained above (`ccatt-brams-4.3-<COMPILES>-CO2_JULES`)
- b) CCATT-BRAMS namelist (RAMSIN)
  - ⇒ There is one model in: `./source/JULES-CCATT-BRAMS1.0/`
  - ⇒ Documentation BRAMS variables:
    - <http://downloads.cptec.inpe.br/~rdown/upload/brams40-namelist-final.pdf>
  - ⇒ Documentation CCATT variables:
    - [http://downloads.cptec.inpe.br/~rdown/upload/BRAMS4.0\\_CATT\\_First\\_Time\\_User\\_Guide\\_Ver1.pdf](http://downloads.cptec.inpe.br/~rdown/upload/BRAMS4.0_CATT_First_Time_User_Guide_Ver1.pdf)
- c) JULES namelist (`jules.in`)
  - ⇒ There is one model in: `./source/JULES-CCATT-BRAMS1.0/`
  - ⇒ Documentation JULES variables: `./source/JULES-CCATT-BRAMS1.0/src/brams/jules/LIB/DOCS/jules_v3.0_users_guide.pdf`
- d) Soil Carbon map (`soil_carbon.txt`), only if `cs!=-1` in `jules.in` (line 554)
  - ⇒ Is a ascci file with three cols (longitude, latitude and soil carbon (C/m<sup>2</sup>)) and a lot of lines (depends of region domain and resolution)
- e) Atmospheric and CO<sub>2</sub> initialization and boundary condition (ex: `dpCO2-2010-03-25-0000.vfm`)

- ⇒ Use geraDP program (<http://brams.cptec.inpe.br/geraDP.shtml>) to convert atmospheric variable (wind, temperature, geopotential and relative humid) in BRAMS format (ex: dp2010-03-25-0000)
- ⇒ Use ./source/Utilits/join-dp\_co2.f90 to join file above (dp) with CO2 boundary condition (Ex. from TM5 model)
- f) Source emissions (ex: Queima\_source-T-2010-03-25-000000-g1.vfm)
  - ⇒ Use: ./source/PREP-CHEM-SRC-1.2  
([http://brams.cptec.inpe.br/in\\_data\\_catt\\_burn\\_map.shtml](http://brams.cptec.inpe.br/in_data_catt_burn_map.shtml))
- g) NDVI ([http://brams.cptec.inpe.br/in\\_data\\_ndvi\\_modis.shtml](http://brams.cptec.inpe.br/in_data_ndvi_modis.shtml))
- h) Soil Moisture ([http://brams.cptec.inpe.br/in\\_data\\_soil\\_moisture.shtml](http://brams.cptec.inpe.br/in_data_soil_moisture.shtml))
- i) SST ([http://brams.cptec.inpe.br/in\\_data\\_gl\\_weekly\\_sst.shtml](http://brams.cptec.inpe.br/in_data_gl_weekly_sst.shtml))
- j) Soil Textural Class ([http://brams.cptec.inpe.br/in\\_data\\_soil\\_textural.shtml](http://brams.cptec.inpe.br/in_data_soil_textural.shtml))
- k) Landuse ([http://brams.cptec.inpe.br/in\\_data\\_landuse.shtml](http://brams.cptec.inpe.br/in_data_landuse.shtml))
- l) Topography ([http://brams.cptec.inpe.br/in\\_data\\_topography.shtml](http://brams.cptec.inpe.br/in_data_topography.shtml))

## 5.2 Hint to execute the model

- a) Create a folder named "run" (mkdir run)
- b) Enter in "run" (cd run)
- c) Create a link to executable (ln -s ../source/JULES-CCATT-BRAMS1.0/build/ccatt-brams-4.3-pgf-CO2\_JULES)
- d) Create a link to tables folder (ln -s ../source/JULES-CCATT-BRAMS1.0/tables)
- e) Copy RAMSIN\_model (cp ../source/JULES-CCATT-BRAMS1.0/RAMSIN\_model RAMSIN)
- f) Copy jules.in\_model (cp ../source/JULES-CCATT-BRAMS1.0/jules.in\_model jules.in)
- g) Open RAMSIN in ascii editor (gedit, nedit, vi, ...) to make the necessary changes
- h) Create the outputs folders: IVAR, HIS, ANL, sfc and tmp (mkdir IVAR HIS ANL sfc tmp)
- i) Execute the model for phases: MAKESFC, MAKEVFILE and INITIAL (see: [http://downloads.cptec.inpe.br/~rdown/upload/Brams\\_First\\_Time\\_User\\_Guide\\_Ver4.pdf](http://downloads.cptec.inpe.br/~rdown/upload/Brams_First_Time_User_Guide_Ver4.pdf))

## 6 POST PROCESSING (RAMSPOST)

- Documentation:
  - [http://downloads.cptec.inpe.br/~rdown/upload/RAMSPOST\\_User\\_guide\\_ver\\_01.pdf](http://downloads.cptec.inpe.br/~rdown/upload/RAMSPOST_User_guide_ver_01.pdf)
- a) To Compile:
  - Open in a ascii editor the file: ./source/Ramspost-5.1/LIB/include.mk
  - Change to the options of your compiler.
  - Execute: ./source/Ramspost-5.1/comp.bash
- b) Configure the namelist (ramspost.inp), see:
  - [http://downloads.cptec.inpe.br/~rdown/upload/RAMSPOST\\_User\\_guide\\_ver\\_01.pdf](http://downloads.cptec.inpe.br/~rdown/upload/RAMSPOST_User_guide_ver_01.pdf)
- c) Run executable: ramspost\_51
- d) Open the forecasts p. ex. in GrADS software (<http://www.iges.org/grads/>)

## 7 TEST CASE

### 7.1 Configuration:

- Grid with horizontal resolution of 20 km
- Amazon region (Grid center: 59.0W ; 3.2S)
- X, Y, Z point = 310, 210, 48
- Six hour of integration (01/Mar/2010 00Z until 01/Mar/2010 06Z)
- Forecast output in each hour

### 7.2 Requisites necessary to this Test Case:

- Download the tarballs: source.tgz and test\_case.tgz
- Execute item 3 to compile all libraries in your machine
- Execute item 4 to compile the model in your machine
- Execute item 6 to compile post processing in your machine

### 7.3 Not necessary to this Test Case:

- Download surface data (topography, NDVI, ...)
- Download Initialization and boundary condition (Atmospheric and CO<sub>2</sub>)
- Prepare source emissions
- Change RAMSIN
- Change jules.in

### 7.4 To execute Test Case:

- Execute item 7.2 and expand all tarballs
  - Execute: `“./TEST_CASE/test_case.bash <nproc>”`, where `<nproc>` is the number of processor that you want to use.
- If everything was alright, was generated the files:
- `./TEST_CASE/grads/test_g1.gra` (binary with variables: Temperature and wind)
  - `./TEST_CASE/grads/test_g1.ctl` (descriptor to GrADS software)
  - `./TEST_CASE/grads/test_field.png` (figure generated by GrADS)
  - `./TEST_CASE/grads/test_serie.png` (figure generated by GrADS)
